# Supplementary material for: Regulation of autophagy and chloroquine sensitivity by oncogenic RAS in vitro is context-dependent
Source: PubMed Central journal article supplement — Autophagy. 2014 Aug 13;10(10):1814–26. doi: 10.4161/auto.32135 (PMC4198365; doi:10.4161/auto.32135), 2014-08-13
Supplement: auto-10-1814-s01.pdf [file auto-10-1814-s01.pdf]

## **Supplemental Material to:**

**Michael J Morgan, Graciela Gamez, Christina Menke,  
Ariel Hernandez, Jacqueline Thorburn, Freddi Gidan,  
Leah Staskiewicz, Shellie Morgan, Christopher Cummings,  
Paola Maycotte, and Andrew Thorburn**

**Regulation of autophagy and chloroquine sensitivity  
by oncogenic RAS in vitro is context-dependent**

**Autophagy 2014; 10(10)**

**<http://dx.doi.org/10.4161/auto.32135>**

**[www.landesbioscience.com/journals/autophagy/article/32135](http://www.landesbioscience.com/journals/autophagy/article/32135)**

# Figure S1

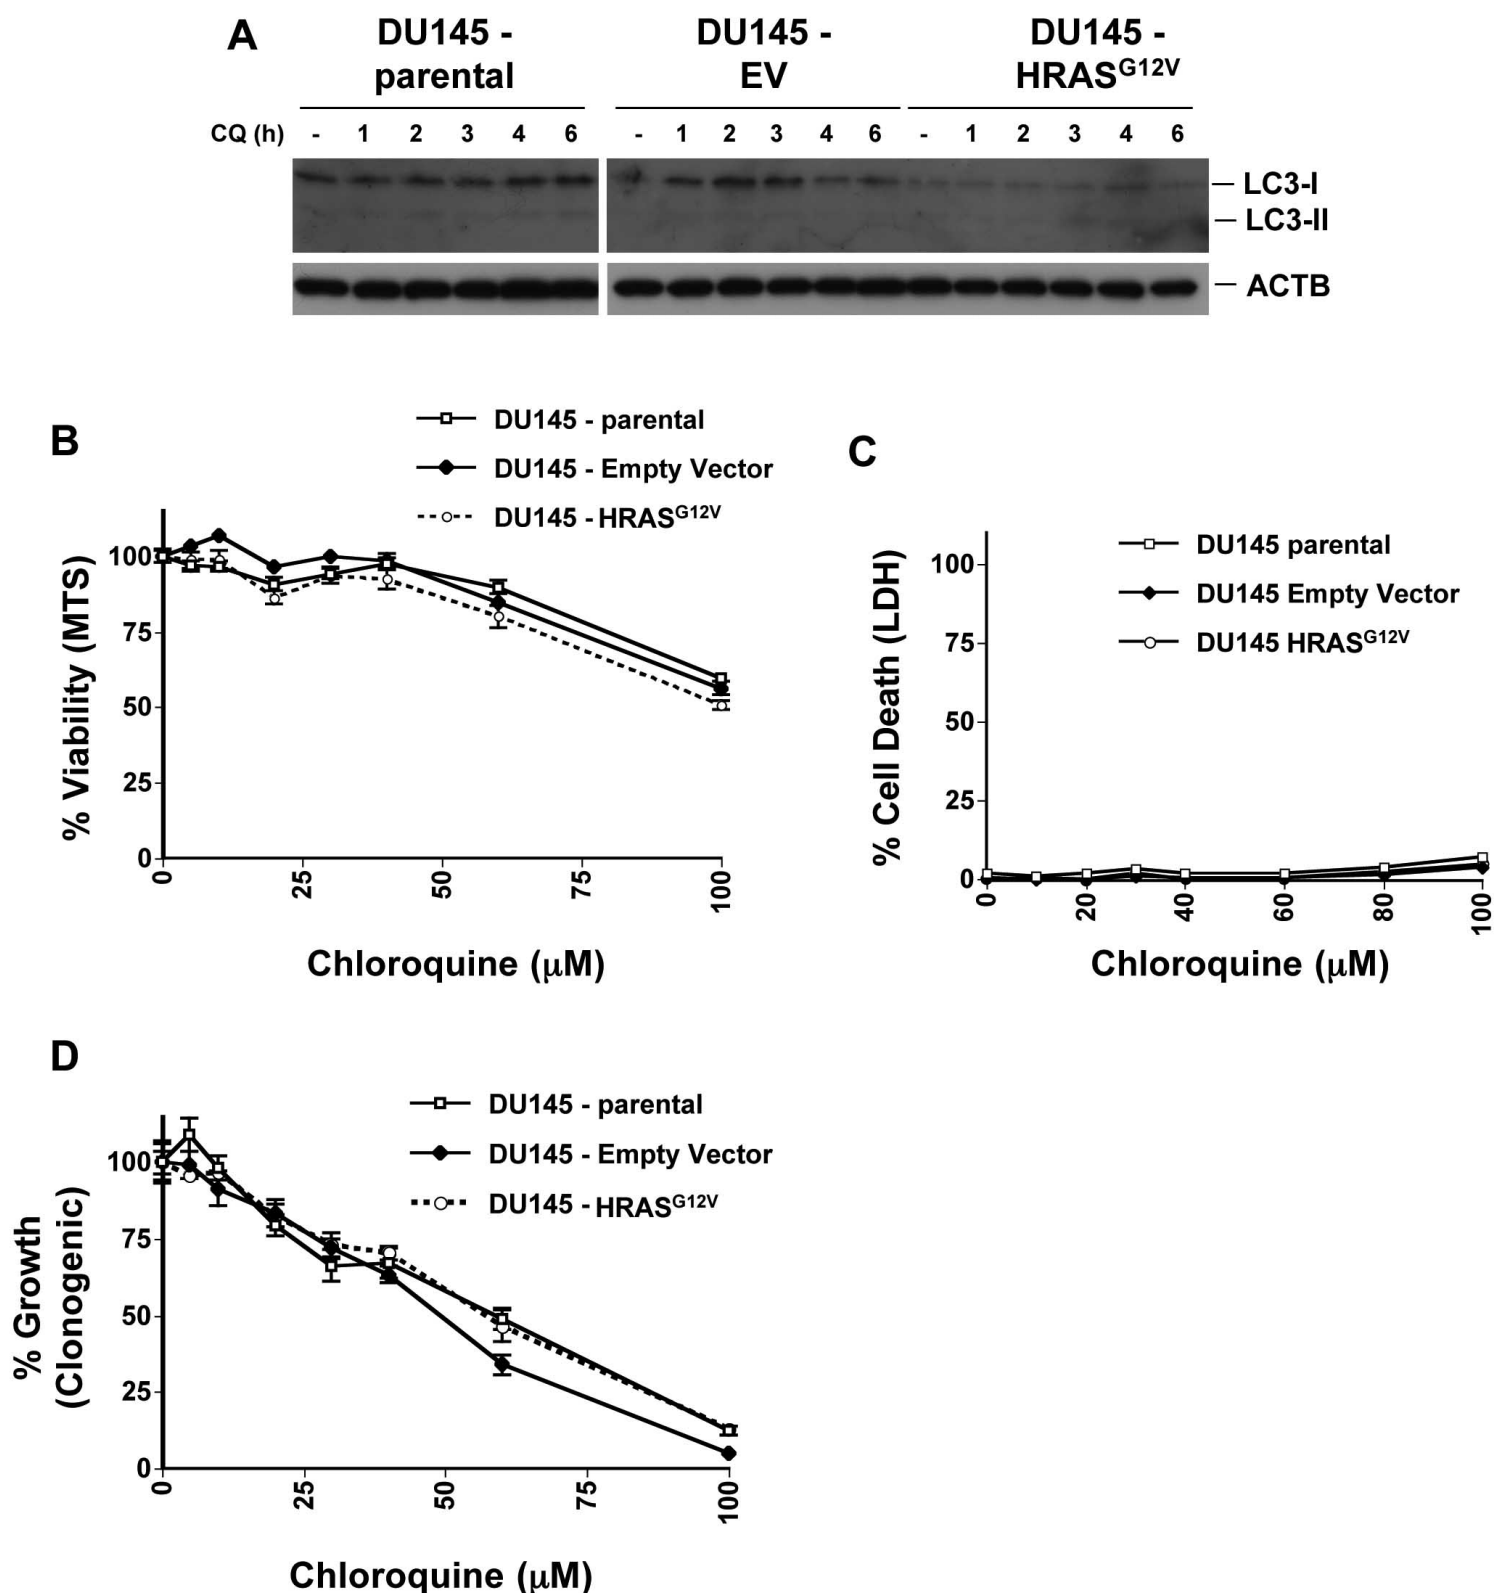

**Figure S1.** RAS does not confer sensitivity or resistance to CQ in DU145 cells. **(A)** DU145 cells or DU145 cells stably integrated with empty vector control or HRAS<sup>G12V</sup> were treated with chloroquine (30 µM) for increasing lengths of time and then cells were lysed and immunoblotted for LC3 and ACTB. **(B, C, D)** Parental DU145 cells or DU145 cells stably integrated with empty vector control or HRAS<sup>G12V</sup> were treated with CQ for 48 h and cell viability, cytotoxicity, and growth were measured by **(B)** MTS viability assay, **(C)** LDH release, and **(D)** clonogenic growth assay as measured by crystal violet staining 5 days after removing the CQ and adding growth media.

# Figure S2

**A**

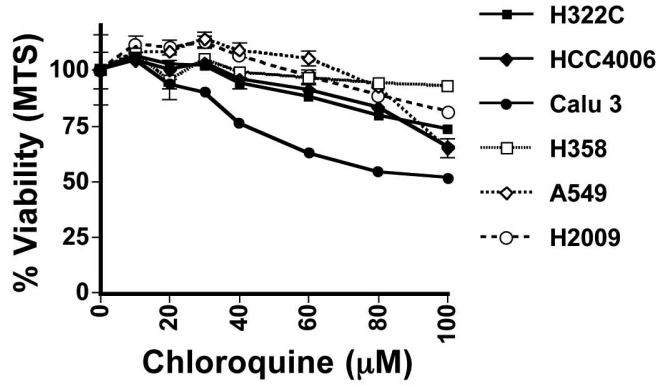

**B**

| Cell line | KRAS status   | TP53 status     | CQ sensitivity |
|-----------|---------------|-----------------|----------------|
| H322C     | WT            | mutant (G12C)   | intermediate   |
| HCC4006   | WT            | WT <sup>#</sup> | intermediate   |
| Calu3     | WT            | mutant (M237I)  | high           |
| H358      | mutant (G12C) | deleted         | moderately low |
| A549      | mutant (G12S) | WT              | low            |
| H2009     | mutant (G12A) | mutant (G12C)   | intermediate   |

**C**

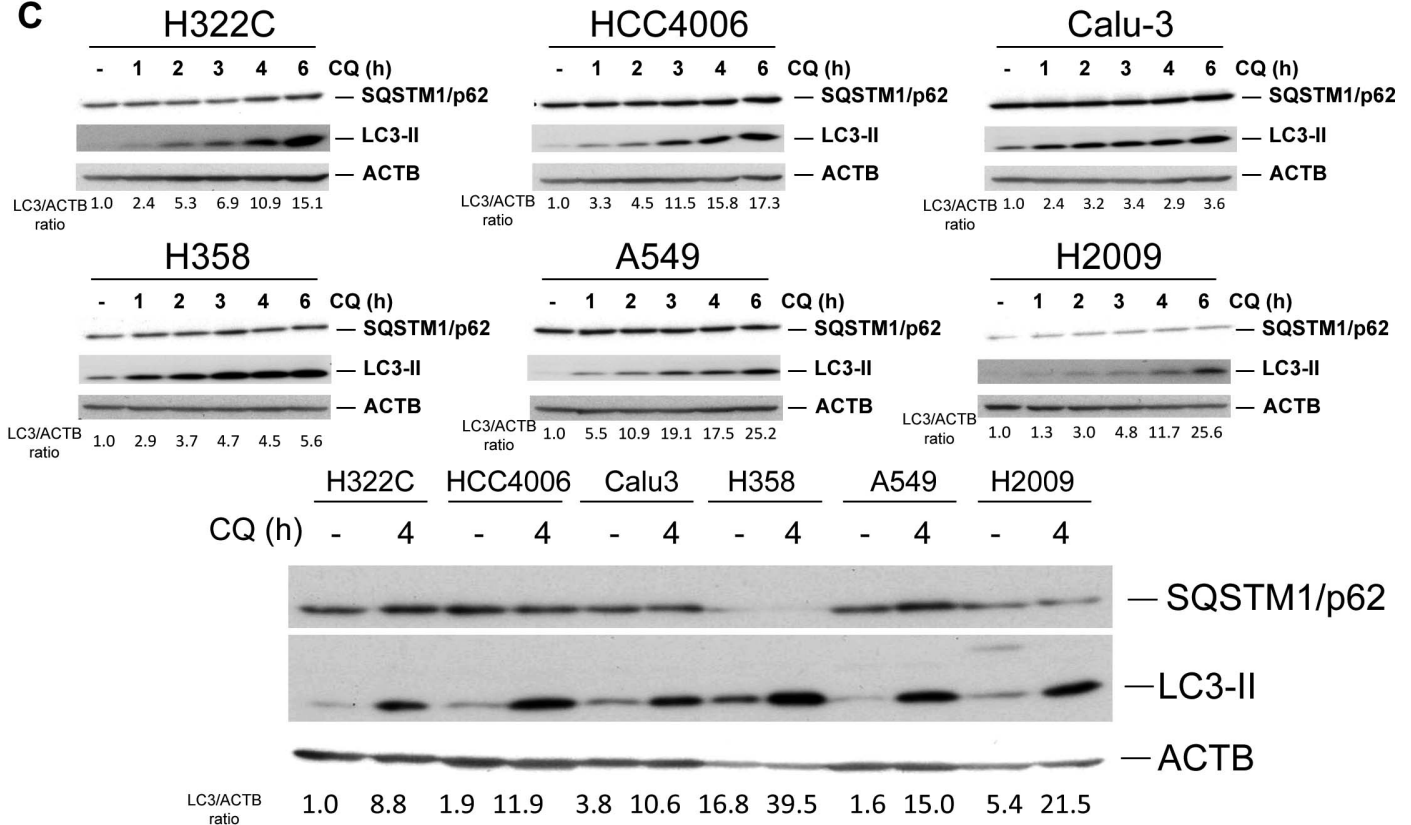

**Figure S2.** RAS status or basal autophagy does not correlate with autophagy dependence in NSCLC lung cell lines. **(A)** H322C, HCC4006, and Calu3 (wt RAS, indicated by filled symbols) and H358, A549, and H2009 (oncogenic KRAS mutant, indicated by unfilled symbols) NSCLC cancer cell lines were treated with chloroquine and assayed by MTS viability assay at 48 h. **(B)** The RAS and TP53 mutation status of the 6 cell lines and their approximate CQ sensitivity are shown. <sup>#</sup> No mutations in TP53 have been described for HCC4006, but to our knowledge, wild-type status has not yet been verified. **(C)** H322C, HCC4006, Calu-3 and H358, A549, and H2009 NSCLC cancer cell lines were treated with CQ (30  $\mu$ M) for the indicated timepoints and then cells were lysed and immunoblotted for SQSTM1, LC3, and ACTB (top panels). Similarly, for comparison, these cells were treated with or without CQ (30  $\mu$ M) for 4 h and then cells were lysed and lysates on the same blot were immunoblotted for SQSTM1, LC3, and ACTB (bottom panels).

**Figure S3****A**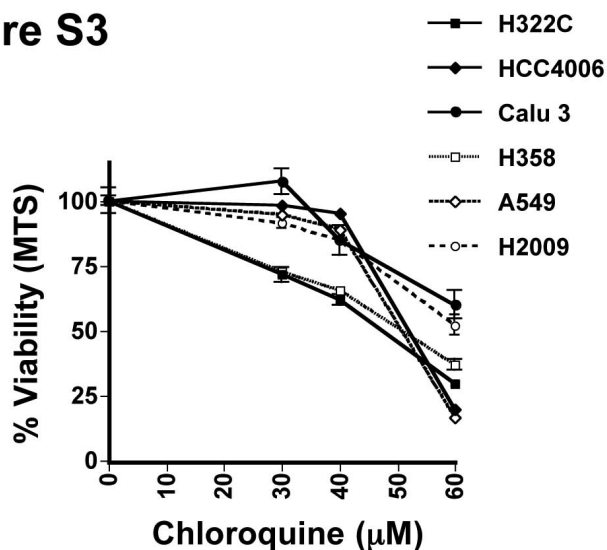**B**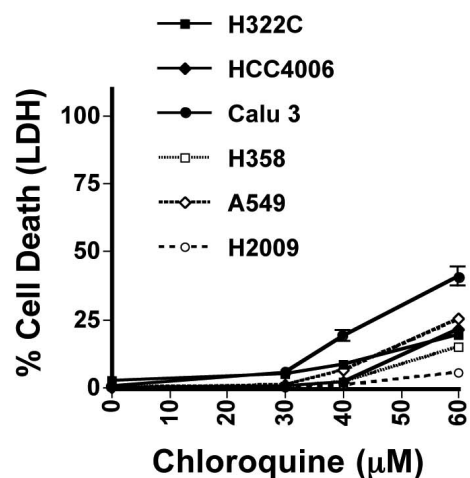**C**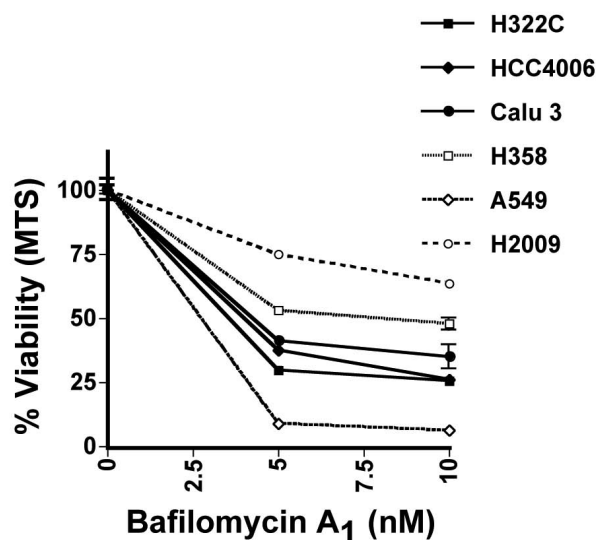**D**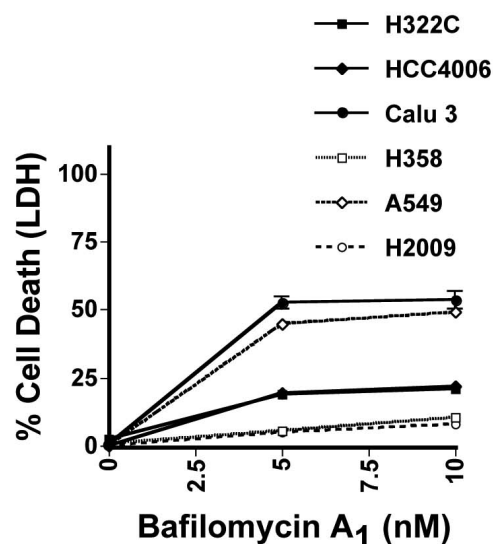**E**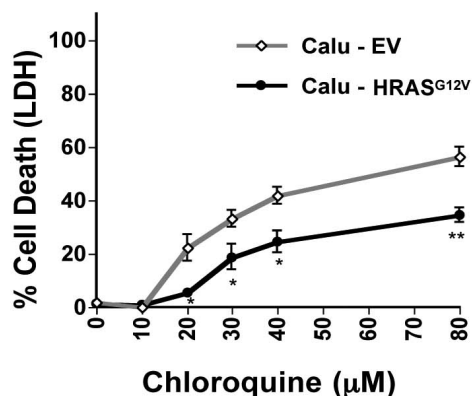**F**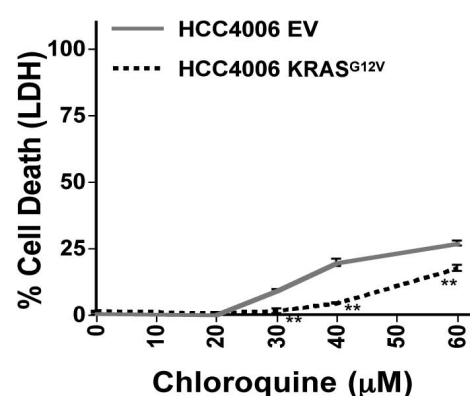

**Figure S3.** When grown in basal media, RAS status does not correlate with sensitivity to autophagy inhibition in NSCLC cell lines. **(A-C)** H322C, HCC4006, and Calu 3 (WT RAS, indicated by filled symbols) and H358, A549, and H2009 (oncogenic KRAS mutant, indicated by unfilled symbols) NSCLC cell lines grown in basal media (RPMI, 10% FBS) were treated with CQ or bafilomycin A<sub>1</sub> and assayed by **(A, C)** MTS viability assay (72 h) or **(B, D)** LDH release cytotoxicity assay (72 h). **(E)** Calu3 cells stably infected with retrovirus expressing HRAS<sup>G12V</sup> or empty vector control were treated with CQ and assayed at 72 h for LDH release. **(F)** HCC4006 cells stably infected with retrovirus expressing KRAS<sup>G12V</sup> or the empty vector control were treated with CQ and assayed at 72 h for LDH release. \*\*  $P < 0.01$ , \*  $P < 0.05$

# Figure S4

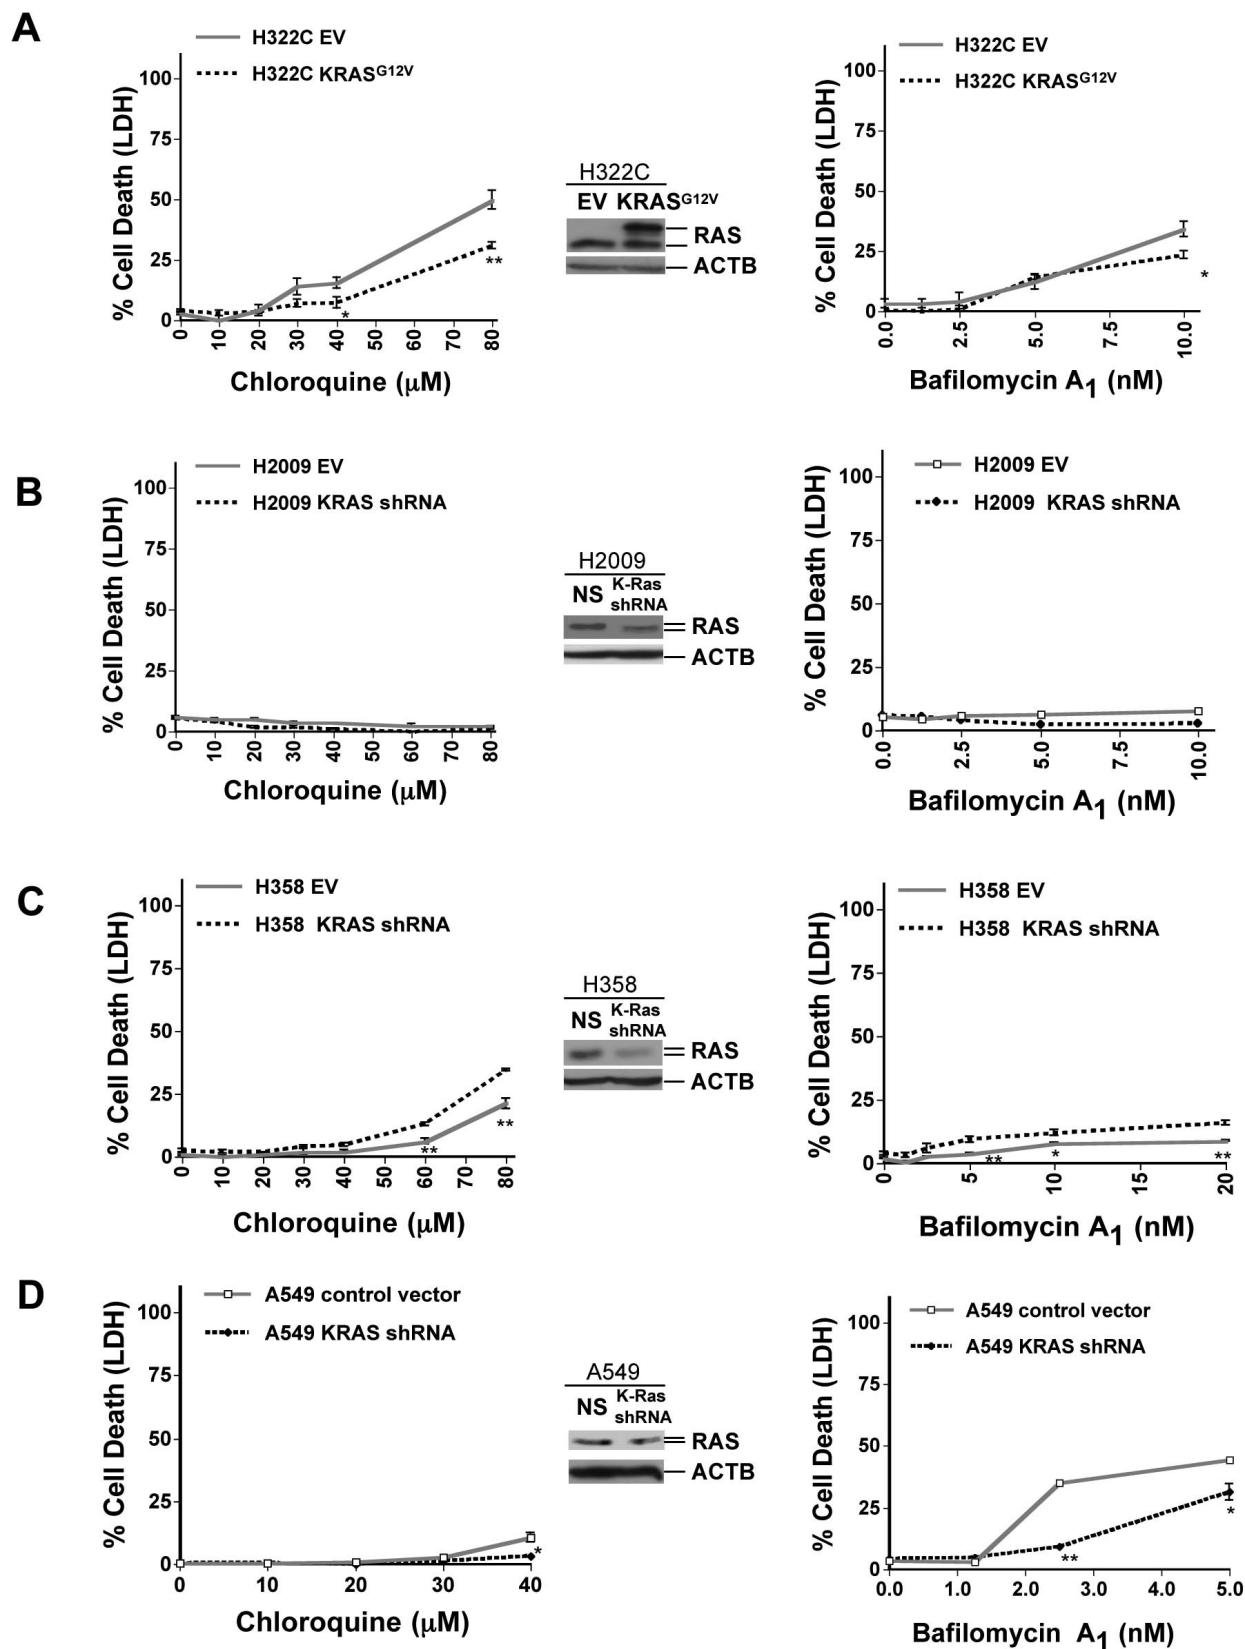

**Figure S4.** RAS can have opposing effects sensitivity to autophagy inhibition in isogenic NSCLC cell lines (A) H322C cells stably infected with retrovirus expressing KRAS<sup>G12V</sup> or the empty vector control were treated with CQ (left) or bafilomycin A<sub>1</sub> (right) and assayed at 72 h for LDH release. (B-D) Oncogenic KRAS mutant cells were stably infected with lentivirus expressing KRAS shRNA or a nonsilencing control and were treated with CQ (left panels) or bafilomycin A<sub>1</sub> (right panels) and assayed at 72 h for LDH release. Shown are (B) H2009, (C) H358, and (D) A549 cells lines. \*\*  $P < 0.01$ , \*  $P < 0.05$ .

**Figure S5**

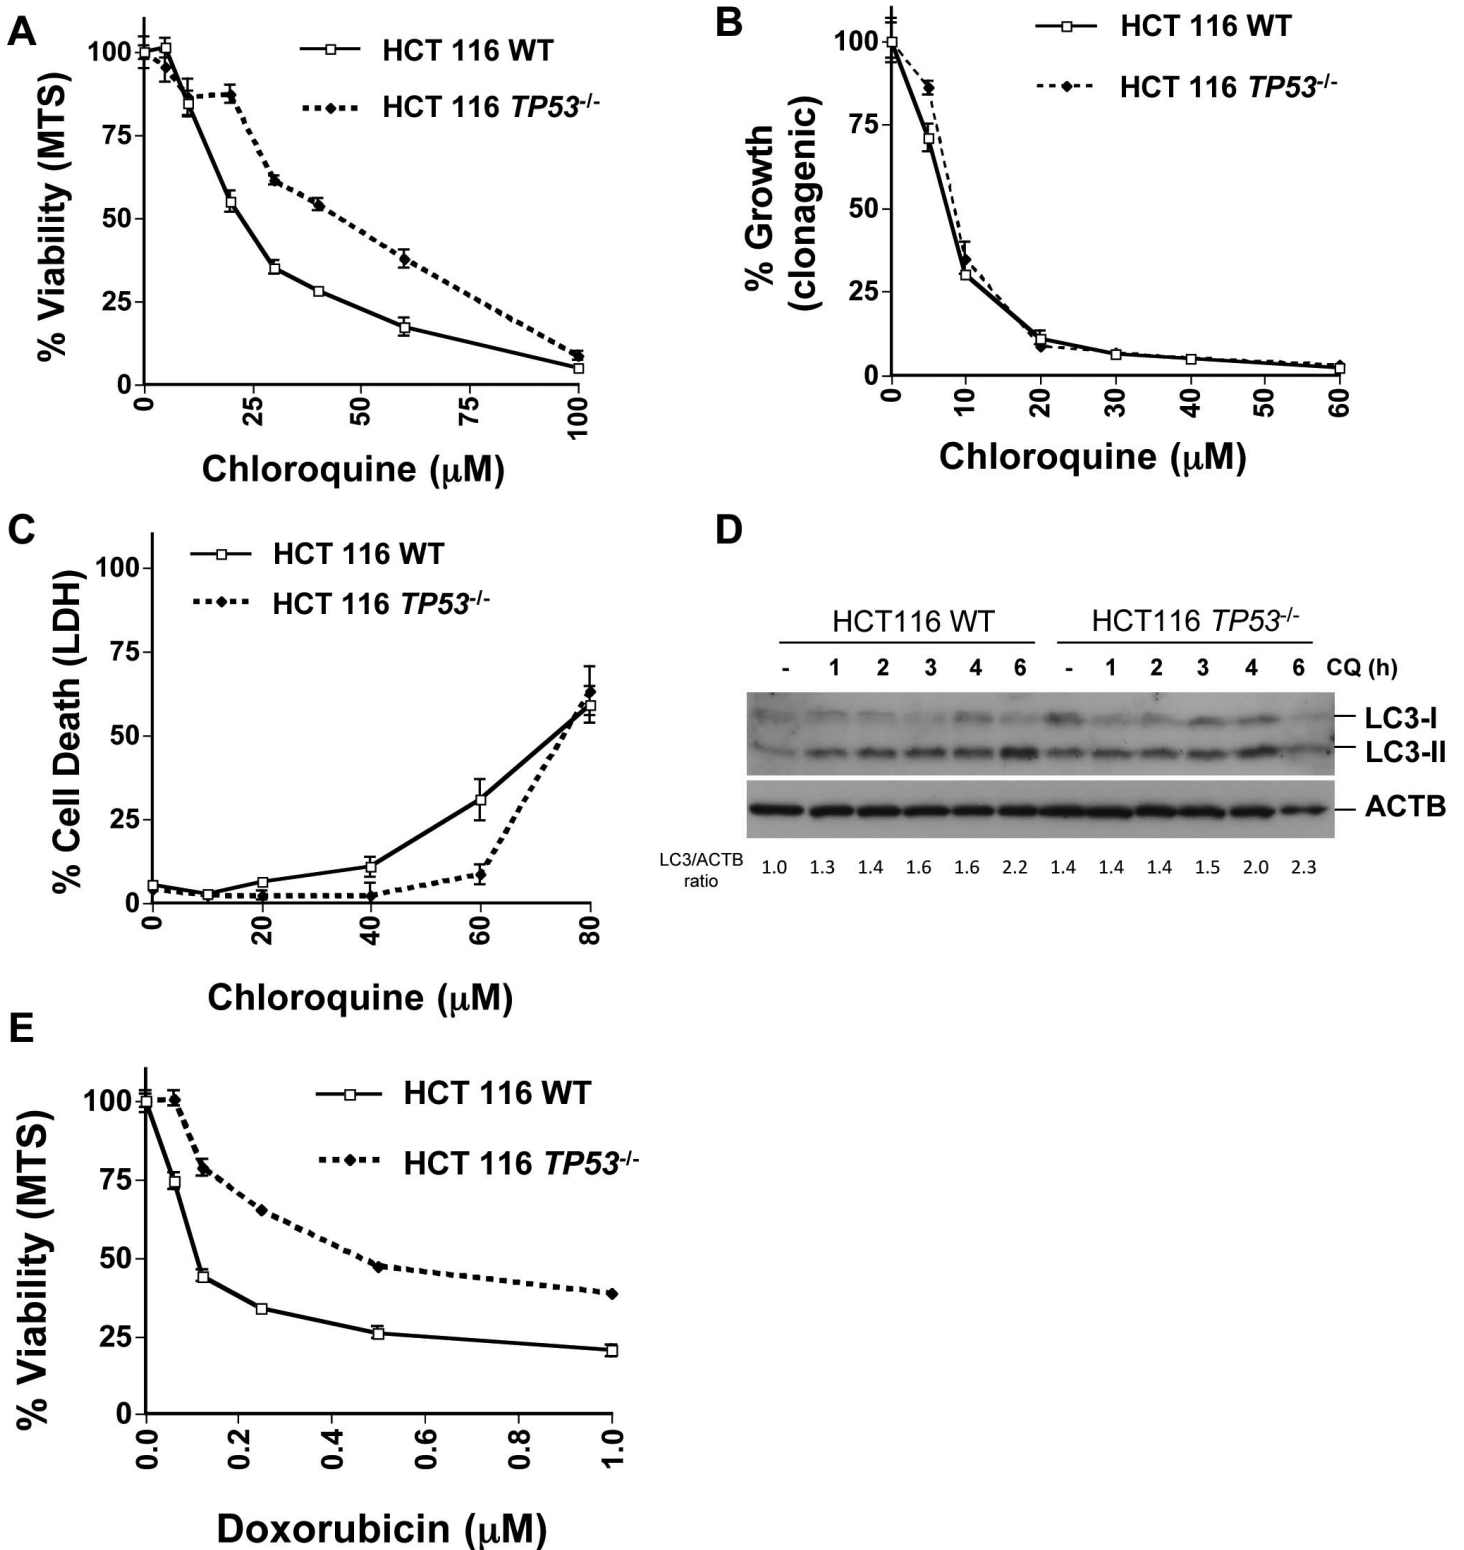

**Figure S5.** Loss of TP53 makes HCT116 cells (KRAS mutant) resistant to toxicity for autophagy inhibition. **(A)** Matched HCT116 cells with or without somatic TP53 deletion were exposed CQ for 48 h, and cell viability was examined by MTS viability assay. **(B)** HCT116 cells were exposed to CQ for 48 h, and cell growth was examined by clonogenic growth assay as measured by crystal violet staining 5 days after removing the CQ and adding growth media. **(C)** HCT116 cells were treated with CQ for 48 h, and cell death was measured by LDH assay. **(D)** HCT116 cells were treated with CQ (30  $\mu\text{M}$ ) for the indicated timepoints and then cells were lysed and immunoblotted for LC3 and ACTB. **(E)** HCT116 cells were treated with doxorubicin for 48 h, and cell viability was examined by MTS viability assay

# Figure S6

**A**

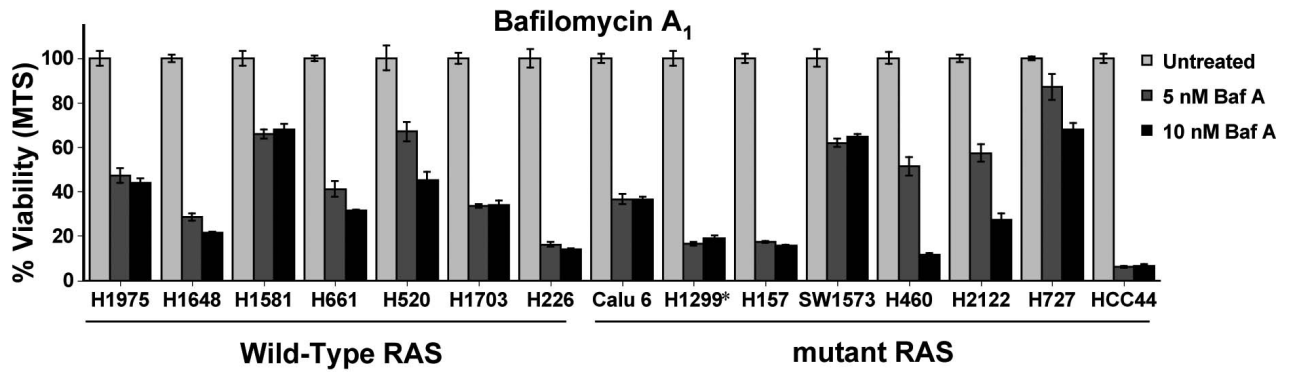

**B**

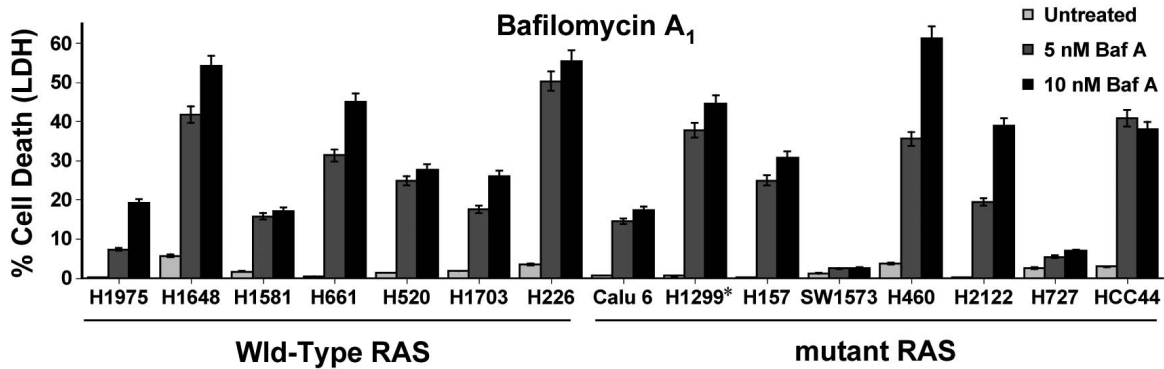

**C**

| Cell line | RAS Status         | TP53 status                             |
|-----------|--------------------|-----------------------------------------|
| H322C     | WT                 | R248L                                   |
| HCC4006   | WT                 | WT <sup>#</sup>                         |
| Calu3     | WT                 | M237I                                   |
| H358      | mutant KRAS (G12C) | null                                    |
| A549      | mutant KRAS (G12S) | WT                                      |
| H2009     | mutant KRAS (G12A) | R273L                                   |
| H1975     | WT                 | R273H                                   |
| H1648     | WT                 | WT, L35 Frameshift                      |
| H1581     | WT                 | WT, Q144X                               |
| H661      | WT                 | R158L, S215I                            |
| H520      | WT                 | W146X                                   |
| H1703     | WT                 | E285K                                   |
| H226      | WT                 | R158L, P309A                            |
| Calu6     | mutant KRAS (Q61K) | R196X                                   |
| H1299     | mutant NRAS (Q61K) | WT, deletion                            |
| H157      | mutant KRAS (G12R) | E298X                                   |
| SW1573    | mutant KRAS (G12C) | WT                                      |
| H460      | mutant KRAS (Q61H) | WT                                      |
| H2122     | mutant KRAS (G12C) | Q16L, C176F                             |
| H727      | mutant KRAS (G12C) | 3AA in frame insertion (Y166/K167/Q168) |
| HCC44     | mutant KRAS (G12C) | R175L, S94X                             |

**Figure S6.** Neither RAS status nor TP53 status correlates with sensitivity to autophagy inhibition in NSCLC lung cell lines. **(A and B)** Multiple NSCLC cancer cell lines with wild-type or oncogenic RAS status as designated were treated with the indicated doses of bafilomycin A<sub>1</sub> and then assayed by **(A)** MTS viability assay (72 h) or **(B)** LDH release cytotoxicity assay (72 h). \*H1299 has an oncogenic mutation in NRAS instead of KRAS. **(C)** The RAS and TP53 mutation status of the cell lines as given in multiple databases (COSMIC, IARC TP53 Database, etc.) is shown. <sup>#</sup>No mutations in TP53 have been described for HCC4006, but to our knowledge, wild-type status has not yet been verified.

**Figure S7**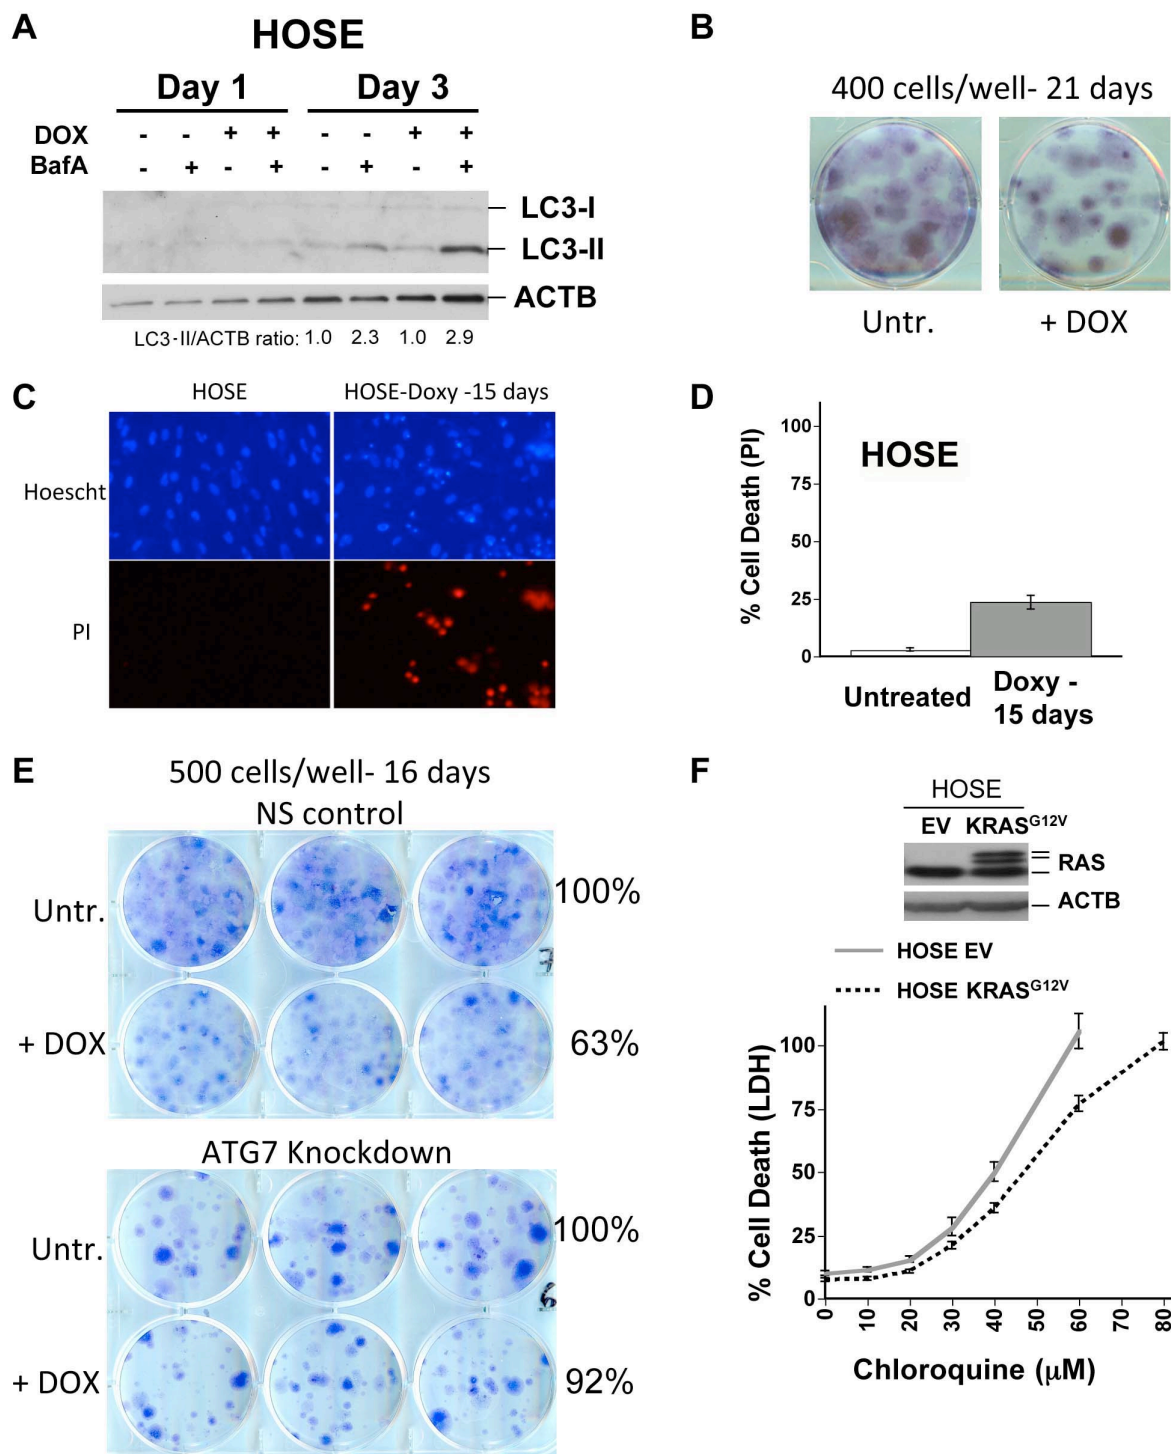

**Figure S7.** Oncogenic RAS expression activates autophagy and promotes cell death in a human ovarian surface epithelial (HOSE) cell line. **(A)** HOSE cells with a tetracycline-inducible HRAS<sup>G12V</sup> transgene (HOSE-HRAS<sup>G12V</sup>) were left untreated or were treated with or without doxycycline (100 ng/mL) for 1 or 3 days. In some cells bafilomycin A<sub>1</sub> (10 nM) was added for 4 h to block flux and then cells were lysed and immunoblotted for LC3 and ACTB to measure basal autophagy. **(B)** HOSE-HRAS<sup>G12V</sup> cells (400) were plated in a 6-well plate and left untreated or were treated with doxycycline (100 ng/mL) for 21 days and analyzed by crystal violet staining. **(C and D)** HOSE-HRAS<sup>G12V</sup> cells were treated with doxycycline (100 ng/mL) for 15 d and analyzed by PI exclusion using fluorescence microscopy. Sample picture is shown in **(C)**, and quantification is shown in **(D)**. **(E)** Similar to **(B)**, 500 HOSE-HRAS<sup>G12V</sup> cells infected with lentivirus expressing ATG7 shRNA or a non-silencing control shRNA were plated on in a 6-well plate and left untreated or were treated with doxycycline (100ng/mL) for 16 days. Cells were fixed and analyzed by crystal violet staining. Quantification of the dye at 540 nm was done after dissolving in 33% acetic acid. **(F)** HOSE-HRAS<sup>G12V</sup> cells (uninduced) were infected with a KRAS<sup>G12V</sup> retrovirus or empty vector virus and, after selection, were exposed to various doses of CQ for 48 h, and cell death was measured by LDH assay.



## Figure S8

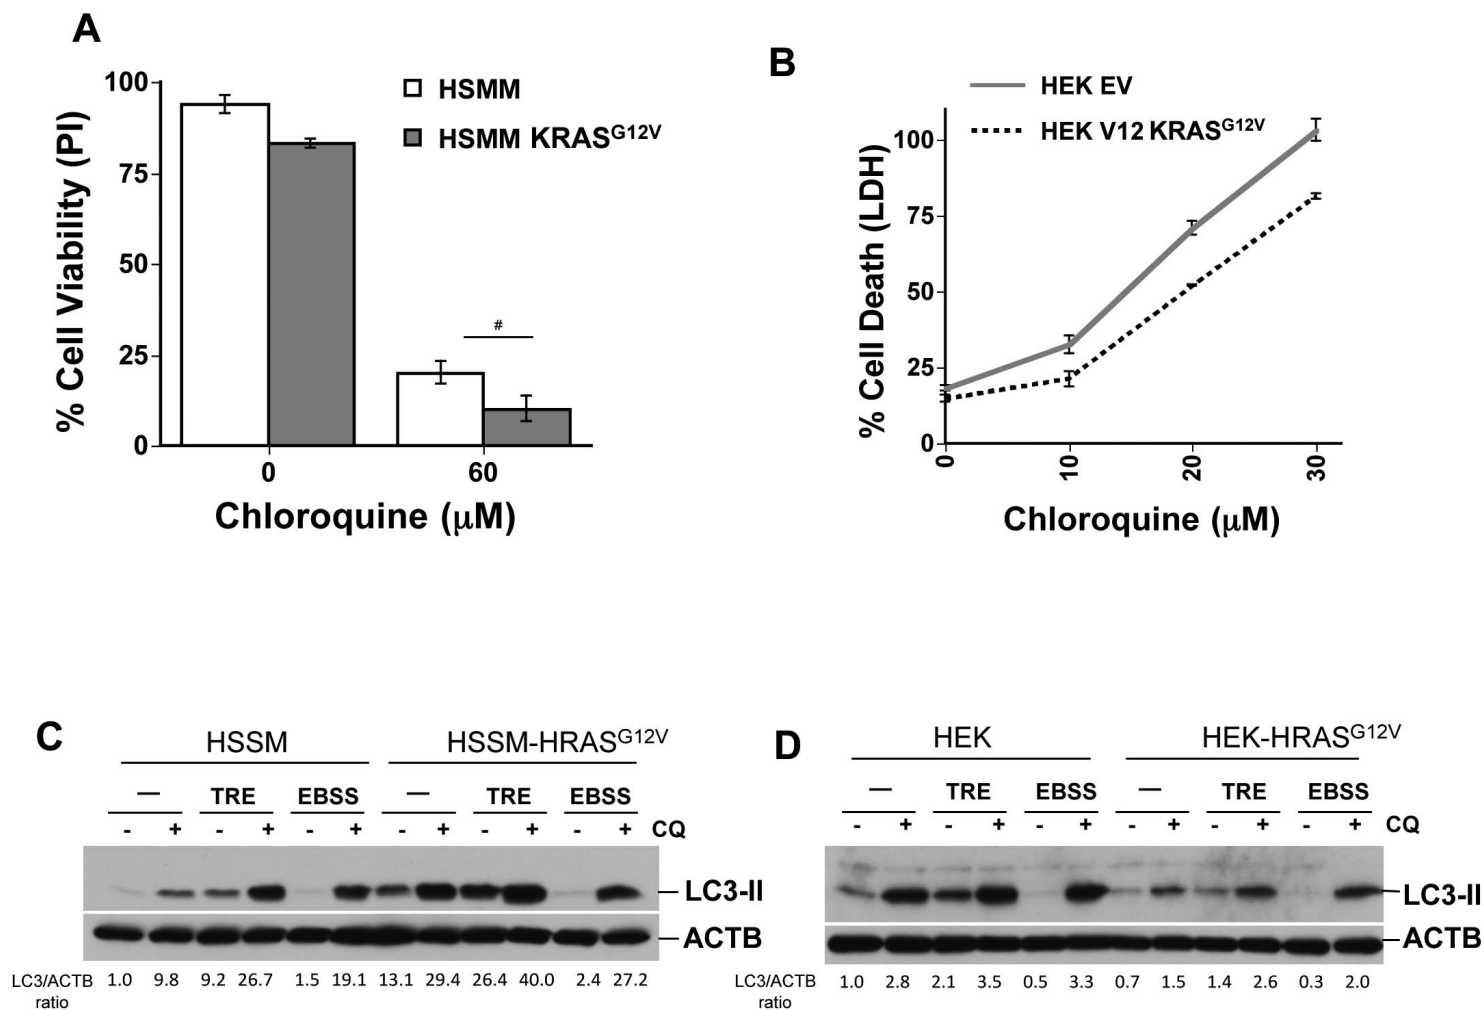

**Figure S8.** RAS has opposing effects on autophagy and CQ sensitivity in genetically defined immortalized human skeletal muscle myoblasts (HSMM) and human embryonic kidney cells (HEK) in stimulated or unstimulated conditions. **(A and B)** Immortalized HSMM **(A)** or HEK cells **(B)** with or without stable expression of KRAS<sup>G12V</sup> were treated with varying doses of CQ for 48 h and assayed by **(A)** propidium iodide exclusion as counted under a fluorescence microscope or **(B)** LDH release cytotoxicity assay. **(C and D)** Immortalized HSMM **(C)** or HEK cells **(D)** with or without stable expression of HRAS<sup>G12V</sup> were treated for 4 h with or without chloroquine CQ (30 μM), in combination with or without trehalose (100 mM) or EBSS as indicated and then cells were lysed and immunoblotted for LC3, and ACTB. \*\*  $P < 0.01$ , \*  $P < 0.05$ , #  $P < 0.08$ .

# Figure S9

**A**

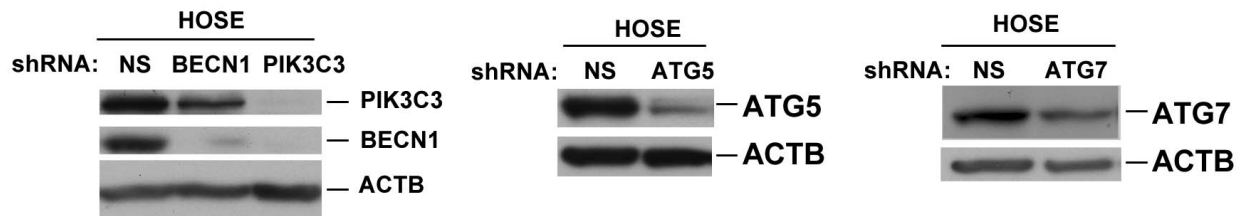

**B**

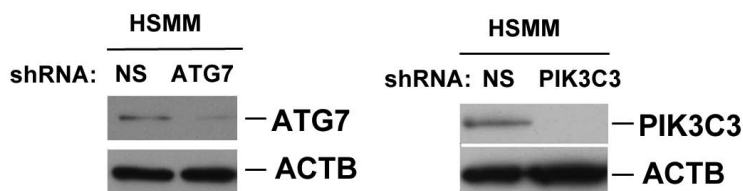

**C**

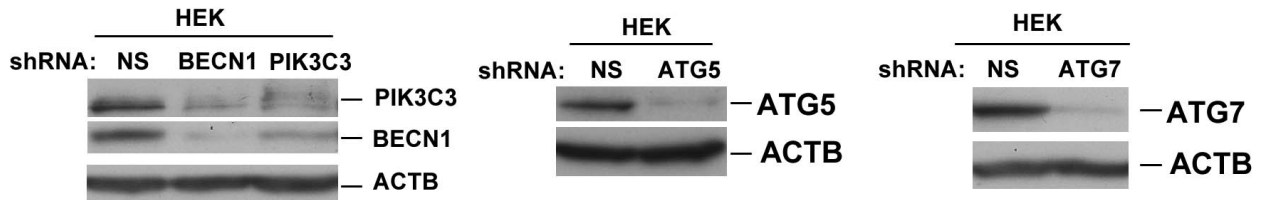

**Figure S9.** Knockdown of autophagy proteins in HOSE, HSMM and HEK cell lines. **(A to C)** Representative western blots show knockdown of autophagy proteins in **(A)** HOSE cells, **(B)** HSMM and **(C)** HEK cell lines.
